# Supplementary material for: Adverse effects observed in lung cancer patients undergoing first-line chemotherapy and effectiveness of supportive care drugs in a resource-limited setting
Source: PubMed Central journal article supplement — Lung India. 2019 Jan-Feb;36(1):32–7. doi: 10.4103/lungindia.lungindia_321_17 (PMC6330793; doi:10.4103/lungindia.lungindia_321_17), 2019
Supplement: LI-36-32_Suppl1.pdf [file LI-36-32_Suppl1.pdf]

# Supplements

## SUPPLEMENT 1

### Supportive care medicines in chemotherapy – Questionnaire

Date: \_\_\_\_\_

Name: \_\_\_\_\_ Contact No: \_\_\_\_\_

Age (in years): \_\_\_\_\_ Gender: Male/Female

Address: \_\_\_\_\_

CR NO: \_\_\_\_\_ LCC NO: \_\_\_\_\_

Smoking Status: \_\_\_\_\_ Current or ex-smoker/Nonsmoker

Height: \_\_\_\_\_ cm Weight: \_\_\_\_\_ kg

BSA: \_\_\_\_\_ Sq.m. BMI: \_\_\_\_\_ kg/m<sup>2</sup>

Histological Type NSCLC/SCLC

NSCLC Subtype Squamous/Adenocarcinoma/Large cell

Undifferentiated (NSCLC-NOS)

Stage (NSCLC and SCLC): T\_\_N\_\_M\_\_ I/II/III/IV A/B

SCLC Stage: ED/LD

Extrathoracic disease, if present: CNS/Liver/Bone/Adrenal/Others \_\_\_\_\_

KPS (10-100) \_\_\_\_\_ ECOG (0-4) \_\_\_\_\_

Need-based treatment taken locally:

- Qualified physician/hospital available nearby? Y/N
- Available health-care facility nearby affordable? Y/N
- Refused treatment by local practitioner/hospital Y/N

Overall survival:

1. Date of diagnosis: \_\_\_\_\_
2. Date of starting treatment: \_\_\_\_\_
3. Survival Status: \_\_\_\_\_ Alive/Dead/Lost to follow-up
4. Date of death (if applicable): \_\_\_\_\_  
Date of last follow-up (if applicable): \_\_\_\_\_

Date of visit

| Cycle and Day | C1 | C2 | C3 | C4 | C5 | C6 |
|---------------|----|----|----|----|----|----|
|---------------|----|----|----|----|----|----|

Vomiting

Onset

Grade

Duration

Drugs taken with dosage and duration

Contd...

---

Date of visit: Contd...

| Cycle and Day                                                          | C1 | C2 | C3 | C4 | C5 | C6 |
|------------------------------------------------------------------------|----|----|----|----|----|----|
| Recovered fully with need-based supportive care drugs prescribed (Y/N) |    |    |    |    |    |    |
| Consulted local physician (Y/N)                                        |    |    |    |    |    |    |
| Required hospitalization (Y/N)                                         |    |    |    |    |    |    |
| Required intravenous medication (Y/N)                                  |    |    |    |    |    |    |
| Expenses on local treatment taken (Rs)                                 |    |    |    |    |    |    |
| Diarrhea                                                               |    |    |    |    |    |    |
| Onset                                                                  |    |    |    |    |    |    |
| Grade                                                                  |    |    |    |    |    |    |
| Duration                                                               |    |    |    |    |    |    |
| Drugs taken with dosage and duration                                   |    |    |    |    |    |    |
| Recovered fully with need-based supportive care drugs prescribed (Y/N) |    |    |    |    |    |    |
| Consulted local physician (Y/N)                                        |    |    |    |    |    |    |
| Required hospitalization (Y/N)                                         |    |    |    |    |    |    |
| Required intravenous medication (Y/N)                                  |    |    |    |    |    |    |
| Expenses on local treatment taken (Rs)                                 |    |    |    |    |    |    |
| Constipation                                                           |    |    |    |    |    |    |
| Onset                                                                  |    |    |    |    |    |    |
| Grade                                                                  |    |    |    |    |    |    |
| Duration                                                               |    |    |    |    |    |    |
| Drugs taken with dosage and duration                                   |    |    |    |    |    |    |
| Recovered fully with need-based supportive care drugs prescribed (Y/N) |    |    |    |    |    |    |
| Consulted local physician (Y/N)                                        |    |    |    |    |    |    |
| Required hospitalization (Y/N)                                         |    |    |    |    |    |    |
| Required intravenous medication (Y/N)                                  |    |    |    |    |    |    |
| Expenses on local treatment taken (Rs)                                 |    |    |    |    |    |    |
| Mucositis                                                              |    |    |    |    |    |    |
| Onset                                                                  |    |    |    |    |    |    |
| Grade                                                                  |    |    |    |    |    |    |
| Duration                                                               |    |    |    |    |    |    |
| Drugs taken with dosage and duration                                   |    |    |    |    |    |    |
| Recovered fully with need-based supportive care drugs prescribed (Y/N) |    |    |    |    |    |    |
| Consulted local physician (Y/N)                                        |    |    |    |    |    |    |
| Required hospitalization (Y/N)                                         |    |    |    |    |    |    |
| Required intravenous medication (Y/N)                                  |    |    |    |    |    |    |
| Expenses on local treatment taken (Rs)                                 |    |    |    |    |    |    |
| Fever                                                                  |    |    |    |    |    |    |
| Onset                                                                  |    |    |    |    |    |    |
| Grade                                                                  |    |    |    |    |    |    |
| Duration                                                               |    |    |    |    |    |    |
| Drugs taken with dosage and duration                                   |    |    |    |    |    |    |
| Recovered fully with need-based supportive care drugs prescribed (Y/N) |    |    |    |    |    |    |
| Consulted local physician (Y/N)                                        |    |    |    |    |    |    |
| Required hospitalization (Y/N)                                         |    |    |    |    |    |    |
| Required intravenous medication (Y/N)                                  |    |    |    |    |    |    |
| Expenses on local treatment taken (Rs)                                 |    |    |    |    |    |    |
| Pain                                                                   |    |    |    |    |    |    |
| Onset                                                                  |    |    |    |    |    |    |
| Grade                                                                  |    |    |    |    |    |    |
| Duration                                                               |    |    |    |    |    |    |
| Drugs taken with dosage and duration                                   |    |    |    |    |    |    |
| Recovered fully with need-based supportive care drugs prescribed (Y/N) |    |    |    |    |    |    |
| Consulted local physician (Y/N)                                        |    |    |    |    |    |    |
| Required hospitalization (Y/N)                                         |    |    |    |    |    |    |
| Required intravenous medication (Y/N)                                  |    |    |    |    |    |    |
| Expenses on local treatment taken (Rs)                                 |    |    |    |    |    |    |
| Cough/hemoptysis                                                       |    |    |    |    |    |    |
| Onset                                                                  |    |    |    |    |    |    |
| Grade                                                                  |    |    |    |    |    |    |
| Duration                                                               |    |    |    |    |    |    |
| Drugs taken with dosage and duration                                   |    |    |    |    |    |    |
| Recovered fully with need-based supportive care drugs prescribed (Y/N) |    |    |    |    |    |    |
| Consulted local physician (Y/N)                                        |    |    |    |    |    |    |
| Required hospitalization (Y/N)                                         |    |    |    |    |    |    |
| Required intravenous medication (Y/N)                                  |    |    |    |    |    |    |
| Expenses on local treatment taken (Rs)                                 |    |    |    |    |    |    |

---

Contd...

---

Date of visit: Contd...

| Cycle and Day                                                          | C1 | C2 | C3 | C4 | C5 | C6 |
|------------------------------------------------------------------------|----|----|----|----|----|----|
| Anemia                                                                 |    |    |    |    |    |    |
| WHO Grade                                                              |    |    |    |    |    |    |
| Drugs taken with dosage and duration                                   |    |    |    |    |    |    |
| Recovered fully with need-based supportive care drugs prescribed (Y/N) |    |    |    |    |    |    |
| Consulted local physician (Y/N)                                        |    |    |    |    |    |    |
| Required hospitalization (Y/N)                                         |    |    |    |    |    |    |
| Required blood transfusions (Y/N)                                      |    |    |    |    |    |    |
| Required ESA (Y/N)                                                     |    |    |    |    |    |    |
| Expenses on local treatment taken (Rs)                                 |    |    |    |    |    |    |

---
