# Supplementary material for: Adverse effects observed in lung cancer patients undergoing first-line chemotherapy and effectiveness of supportive care drugs in a resource-limited setting
Source: PubMed Central journal article supplement — Lung India. 2019 Jan-Feb;36(1):32–7. doi: 10.4103/lungindia.lungindia_321_17 (PMC6330793; doi:10.4103/lungindia.lungindia_321_17), 2019
Supplement: LI-36-32_Suppl2.pdf [file LI-36-32_Suppl2.pdf]

## SUPPLEMENT 2

Supportive care medicines prescribed at the lung cancer clinic of Postgraduate Institute of Medical Education and Research (PGIMER), Chandigarh

Mandatory supportive care medicines after each cycle of chemotherapy:

- Tablet dexamethasone 4 mg – one tablet three times a day for 3 days
- Tablet esomeprazole 40 mg OD an hour before breakfast for 5 days

Hematinics:

- Tablet folic acid 0.5 mg along with elemental iron 100 mg once/twice a day
- Tablet Vitamin B<sub>1</sub> 10 mg with vitamin B<sub>6</sub> 3mg OD
- Tablet ferrous sulfate 200 mg BD (for pemetrexed)
- Syrup containing folic acid 200 mcg, Vitamin B12 5 mcg, Nicotinamide 20 mg/5 ml – 5 ml OD (for pemetrexed)

Symptom-based supportive medications taken as and when needed:

- Epigastric burning or pain – Tablet esomeprazole 40 mg
- Vomiting/nausea
  - Tablet aprepitant 125 mg on day 1 and 80 mg on days 2 and 3. Tablet granisetron 1 mg (max 2 times/day)
  - Tablet prochlorperazine 10 mg (max 3 times/day)
- Constipation
  - Isabgol husk 3–4 tablespoon HS with water or milk
  - Tablet bisacodyl 5 mg HS
  - Syrup lactulose 3–4 tsp
- Diarrhea
  - Tablet loperamide 2 mg two tablets stat and once every 3–4 h
  - Tablet ciprofloxacin 500 mg + tinidazole 600 mg BD × 5 days (if diarrhea is associated with fever or blood/mucus in stool)
- Dry cough and/or streaky hemoptysis
  - Syrup levocloperastine 20 mg/5 ml 1 teaspoon (maximum thrice a day)
  - Syrup codeine 10 mg/5 ml 2 teaspoons (maximum three-four times a day)
- Mouth ulcers – Multivitamin 1 OD × 10 days
- Fever – Tablet paracetamol 500 mg (maximum four times a day)
- Pain
  - Tablet tramadol 37.5 + paracetamol 325 mg (max two times a day)
  - Tablet diclofenac 50–100 mg (max two times a day)
  - Tablet codeine 30 mg + paracetamol 650 mg 1 tablet (max three times a day)
